# Supplementary material for: A universal molecular prognostic score for gastrointestinal tumors
Source: PubMed Central journal article supplement (PMC7862603; doi:10.1038/s41525-021-00172-1), 2021-02-04
Supplement: 41525_2021_172_MOESM1_ESM.pdf [file 41525_2021_172_MOESM1_ESM.pdf]

**SUPPLEMENTARY INFORMATION**

**A universal molecular prognostic score for  
gastrointestinal tumors**

Hideyuki Shimizu, Keiichi I. Nakayama

**Supplementary Data 1–3**

**Supplementary Figures 1 and 2**

## **SUPPLEMENTARY DATA**

**Supplementary Data 1** Differentially expressed genes (DEGs) between cancer cells and surrounding mucosa in TCGA-COAD patients. (Provided as an Excel file and not included here.)

**Supplementary Data 2** International colorectal cancer (CRC) cohorts used in this research. (Provided as an Excel file and not included here.)

**Supplementary Data 3** Prognosis-related differentially expressed genes in colorectal cancer patients. (Provided as an Excel file and not included here.)

**SUPPLEMENTARY FIGURES**

**a** TCGA-NH-A8F7

| Gene name | Expression   | Gene_Score | Gene_Weight | Score x Weight |
|-----------|--------------|------------|-------------|----------------|
| PER3      | Above median | 1          | 5.100       | 5.100          |
| PRSS53    | Below median | 0          | 4.569       | 0              |
| KIFC3     | Below median | 0          | 3.328       | 0              |
| TYRP1     | Above median | 1          | 2.078       | 2.078          |
| BTBD16    | Below median | 0          | 1.337       | 0              |
| CHRNA3    | Above median | 1          | 1.047       | 1.047          |
| -----     |              |            |             |                |
| LGR4      | Below median | 1          | 4.597       | 4.597          |
| LYAR      | Below median | 1          | 4.439       | 4.439          |
| CCT2      | Below median | 1          | 4.404       | 4.404          |
| CCNE1     | Above median | 0          | 4.226       | 0              |
| PRMT1     | Below median | 1          | 4.155       | 4.155          |
| TESK2     | Below median | 1          | 4.060       | 4.060          |
| LYPD6     | Above median | 0          | 3.960       | 0              |
| F2RL1     | Above median | 0          | 1.465       | 0              |
| CEP55     | Below median | 1          | 1.061       | 1.061          |
| SIAE      | Below median | 1          | 0.174       | 0.174          |

**mPS 31.115**

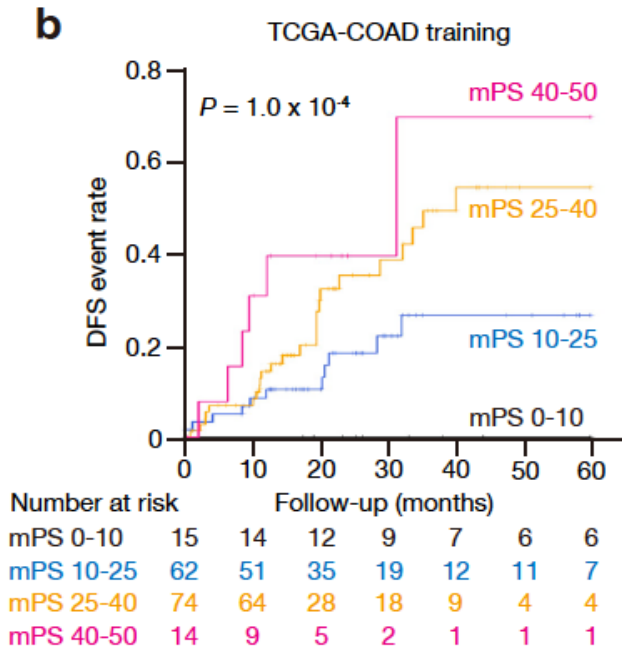

**Shimizu et al. Supplementary Figure S1**

**Supplementary Fig. 1 Calculation and stratification of mPS\_colon in the TCGA-COAD training cohort. a** Representative calculation of mPS\_colon (for patient TCGA-NH-A8F7). For the first six genes, Gene\_Score is 1 if the gene is expressed at a level higher than the median in the cancer; for the remaining 10 genes, Gene\_Score is 1 if the gene is expressed at a level lower than the median. Otherwise, Gene\_Score is set to 0. mPS\_colon is calculated by summation of the weighted scores. **b** Kaplan-Meier curves of disease-free survival (DFS) for the TCGA-COAD training cohort based on mPS\_colon. The log-rank *P* value is shown.

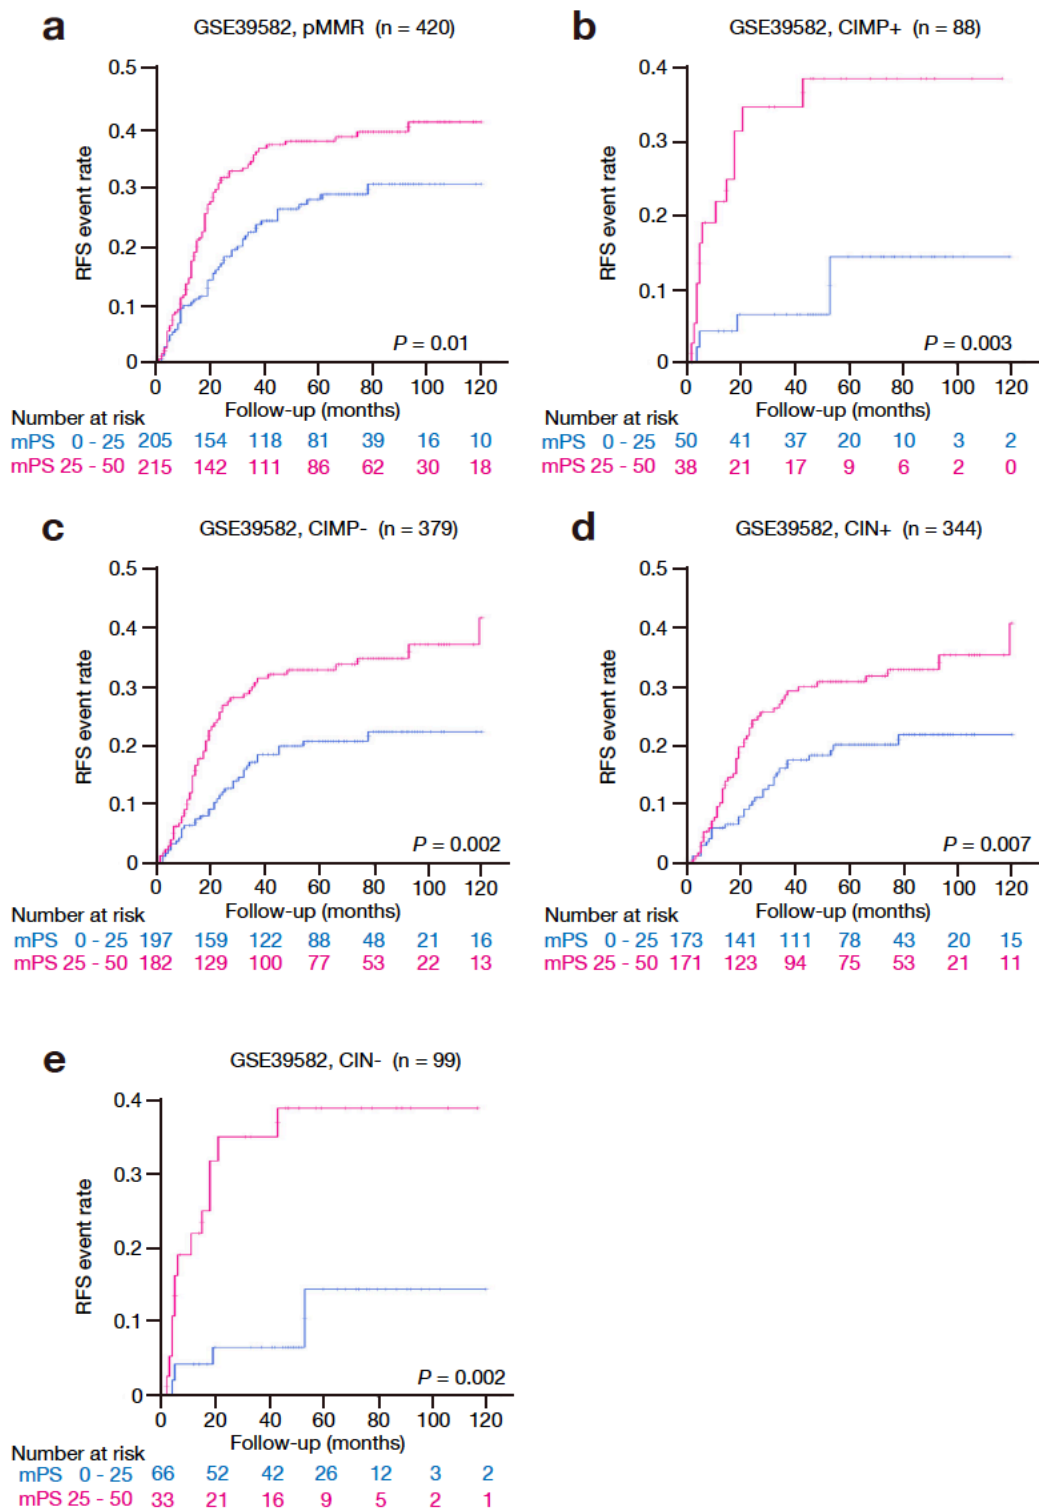

Shimizu et al., Supplementary Fig. 2

**Supplementary Fig. 2 Application of mPS\_colon to broad colorectal cancer subtypes.** Kaplan-Meier curves of relapse-free survival (RFS) according to mPS\_colon are shown for patients in the GSE39582 cohort with mismatch

repair-proficient (pMMR) tumors (**a**), CpG island methylator phenotype (CIMP)-positive (**b**) or -negative (**c**) tumors, or chromosome instability (CIN)-positive (**d**) or -negative (**e**) tumors. The log-rank  $P$  values are indicated. Only patients with available information are included.
